# Supplementary material
Source: PubMed Central journal article supplement (PMC6089219)
Supplement: NIHMS983666-supplement-a.pdf [file NIHMS983666-supplement-a.pdf]

## SUPPORTING INFORMATION

### **Structural basis of ALDH1A2 inhibition by irreversible and reversible small molecule inhibitors**

Yan Chen, Jin-Yi Zhu, Kwon Ho Hong, David Mikles, Gunda I. Georg, Alex S. Goldstein, John K. Amory, Ernst Schönbrunn

|                               |               |
|-------------------------------|---------------|
| Methods                       | Page S2       |
| Supplementary Table S1        | Page S3       |
| Supplementary Figures S1 – S3 | Pages S4 – S6 |

**Compound properties.** Compounds CM121 and 6-118 were > 95% pure by HPLC chromatography (Normal Phase; Supelcosil LC-SI, 3  $\mu$ M, 4.6 x 150 mm, 2.0 ml/min 9:1 hexane:ethanol) and Reverse Phase; Beckman Coulter Ultrasphere, 5  $\mu$ m, 4.6 x 250 mm, 2.0 ml/min 0-7 min 60/40 to 80/20 0.1% TFA in Acetonitrile/0.1% TFA in H<sub>2</sub>O) and gave satisfactory high resolution mass spectrometry. Analytical TLC was performed using silica gel 60 F<sub>254</sub> precoated on aluminum sheets (0.20 mm thickness). <sup>1</sup>H-NMR Chemical shift values are given in ppm and splitting constants measured in Hertz. Melting point is uncorrected.

*N*-(4-cyanophenyl)-3-[4-(methylsulfonyl)phenyl]-1-(3-fluorophenyl)-1*H*-pyrazole-4-carboxamide (**CM121**): R<sub>f</sub> (1:1 hexane:EtOAc) 0.71; mp 218-220 C; <sup>1</sup>H-NMR (CDCl<sub>3</sub>, 500 MHz) 8.52 (s, 1H), 7.99 (dd, 4H, J=8.5, 15), 7.88 (d, 2H, J=8.5), 7.77 (d, 2H, J=8.5), 7.43 (d, 1H, J=11), 7.37 (bs, 1H), 7.20 (m, 1H), 6.89 (d, 1H, J=8), 6.80 (m, 1H), 3.05 (s, 3H); ESMS 459 (M-H, 100%); HRMS C<sub>24</sub>H<sub>18</sub>FN<sub>4</sub>O<sub>3</sub>S calc 459.0927, found 459.0922.

{4-[4-nitro-3-(pyrrolidin-1-yl)phenyl]piperazin-1-yl}(3-ethoxythiophen-2-yl)methanone (**6-118**): R<sub>f</sub> (1:1 hexane:EtOAc) 0.45; <sup>1</sup>H-NMR (CDCl<sub>3</sub>, 300 MHz) 7.78 (d, 1H, J=9.3), 7.30 (d, 1H, J=5.4), 6.70 (d, 1H, J=5.4), 6.22 (dd, 1H, J=2.7, 9.3), 6.08 (d, 1H, J=2.1), 4.07 (q, 2H, J=6.9), 3.71 (m, 4H), 3.33 (m, 4H), 3.17 (m, 4H), 1.90 (m, 4H), 1.34 (t, 3H, J=6.9); HRMS C<sub>21</sub>H<sub>27</sub>N<sub>4</sub>O<sub>4</sub>S calc 431.1753, found 431.1756.

**Table S1: X-ray data collection and refinement statistics**

| Structure                                         | ALDH1A2-NAD-WIN18, 446                             | ADLH1A2-NAD-6118                              | ALDH-NAD-CM121                                | ALDH-CM121                                    |
|---------------------------------------------------|----------------------------------------------------|-----------------------------------------------|-----------------------------------------------|-----------------------------------------------|
| <b>Data Collection</b>                            |                                                    |                                               |                                               |                                               |
| <b>Space group</b>                                | P2 <sub>1</sub>                                    | P2 <sub>1</sub> 2 <sub>1</sub> 2 <sub>1</sub> | P2 <sub>1</sub> 2 <sub>1</sub> 2 <sub>1</sub> | P2 <sub>1</sub> 2 <sub>1</sub> 2 <sub>1</sub> |
| <b>Unit cell dimensions</b>                       | a=81.96, b=139.82, c=84.90 Å<br>α=γ=90.00, β=94.07 | a=84.60, b=140.52, c=164.61 Å<br>α=β=γ=90.00  | a=84.85, b= 141.86, c=164.75<br>α=β=γ=90.00   | a=84.83, b= 139.47, c=163.07<br>α=β=γ=90.00   |
| <b>Resolution range</b>                           | 40.8-1.89 (1.89-2.0)                               | 51.1-2.20 (2.2-2.4)                           | 72.8-2.30 (2.3-2.4)                           | 81.5-2.60 (2.6-2.7)                           |
| <b>Unique reflections</b>                         | 150,515 (23,625)                                   | 98,817 (22,278)                               | 88,789 (10,489)                               | 59,848 (6,298)                                |
| <b>Completeness (%)</b>                           | 99.0 (99.7)                                        | 98.7 (97.9)                                   | 99.8 (99.6)                                   | 99.3 (99.2)                                   |
| <b>I/σI</b>                                       | 16.3 (5.04)                                        | 13.9 (4.50)                                   | 17.8 (3.76)                                   | 14.6 (5.07)                                   |
| <b>R<sub>sym</sub><sup>a</sup> (%)</b>            | 6.6 (31.2)                                         | 10.8 (56.3)                                   | 7.9 (64.2)                                    | 12.3 (66.9)                                   |
| <b>Structure refinement</b>                       |                                                    |                                               |                                               |                                               |
| <b>Non-solvent atoms</b>                          | 15548                                              | 15540                                         | 15552                                         | 15376                                         |
| <b>Solvent molecules</b>                          | 2169                                               | 712                                           | 382                                           | 194                                           |
| <b>Average B-factor all (Å<sup>2</sup>)</b>       | 17.4                                               | 30.8                                          | 42.3                                          | 45.3                                          |
| <b>Average B-factor protein (Å<sup>2</sup>)</b>   | 16.1                                               | 30.7                                          | 42.2                                          | 45.3                                          |
| <b>Average B-factor NAD (Å<sup>2</sup>)</b>       | 22.1                                               | 29.2                                          | 49.5                                          | ---                                           |
| <b>Average B-factor inhibitor (Å<sup>2</sup>)</b> | 27.6                                               | 41.9                                          | 59.3                                          | 57.2                                          |
| <b>Average B-factor solvent (Å<sup>2</sup>)</b>   | 27.6                                               | 32.4                                          | 38.9                                          | 36.8                                          |
| <b>R<sub>cryst</sub><sup>b</sup> (%)</b>          | 13.8                                               | 20.3                                          | 20.6                                          | 22.2                                          |
| <b>R<sub>free</sub><sup>c</sup> (%)</b>           | 17.8                                               | 26.9                                          | 26.4                                          | 27.7                                          |
| <b>R<sub>free</sub> reflection set size</b>       | 1504 (1.0 %)                                       | 988 (1.0 %)                                   | 1775 (2.0 %)                                  | 1076 (1.8 %)                                  |
| <b>r.m.s.d.<sup>d</sup> bonds (Å)</b>             | 0.008                                              | 0.003                                         | 0.002                                         | 0.004                                         |
| <b>r.m.s.d angles (°)</b>                         | 0.889                                              | 0.834                                         | 0.541                                         | 0.610                                         |
| <b>Wilson B (Å<sup>2</sup>)</b>                   | 16.1                                               | 27.8                                          | 37.9                                          | 36.2                                          |
| <b>Coordinate error (Å)</b>                       | 0.16                                               | 0.30                                          | 0.32                                          | 0.34                                          |
| <b>Ramachadran favored (%)</b>                    | 97.8                                               | 95.0                                          | 94.0                                          | 92.9                                          |
| <b>Ramachadran allowed (%)</b>                    | 2.2                                                | 4.4                                           | 4.5                                           | 5.9                                           |

<sup>a</sup> R<sub>sym</sub> = 100 x Σh Σi ||h<sub>i</sub> - I<sub>h</sub>| / Σh I<sub>h</sub> where h are unique reflection indices.

<sup>b</sup> R<sub>cryst</sub> = 100 x Σ|F<sub>obs</sub> - F<sub>model</sub>| / Σ F<sub>obs</sub> where F<sub>obs</sub> and F<sub>model</sub> are observed and calculated structure factor amplitudes, respectively.

<sup>c</sup> R<sub>free</sub> is R<sub>cryst</sub> calculated for randomly chosen unique reflections, which were excluded from the refinement.

<sup>d</sup> r.m.s.d. = root mean square deviation from ideal values.

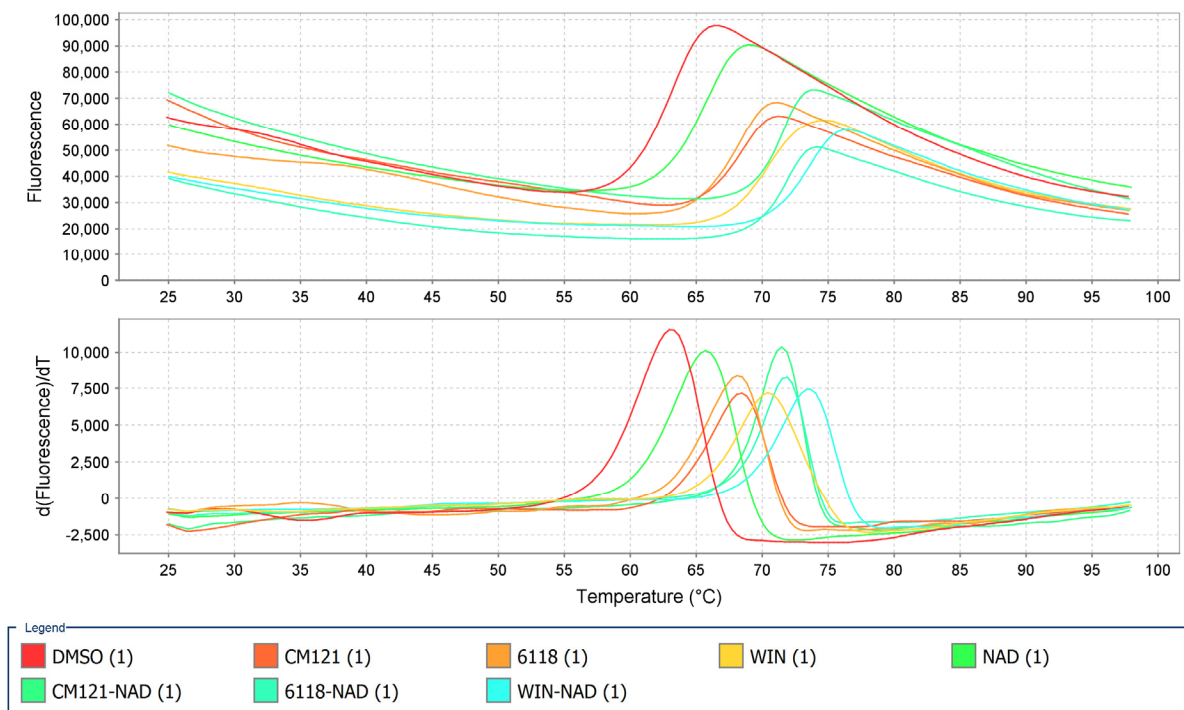

**Fig. S1: Representative DSF data of ALDH1A2-ligand complexes.** Top: Melt curve plot. Bottom: Derivative plot.

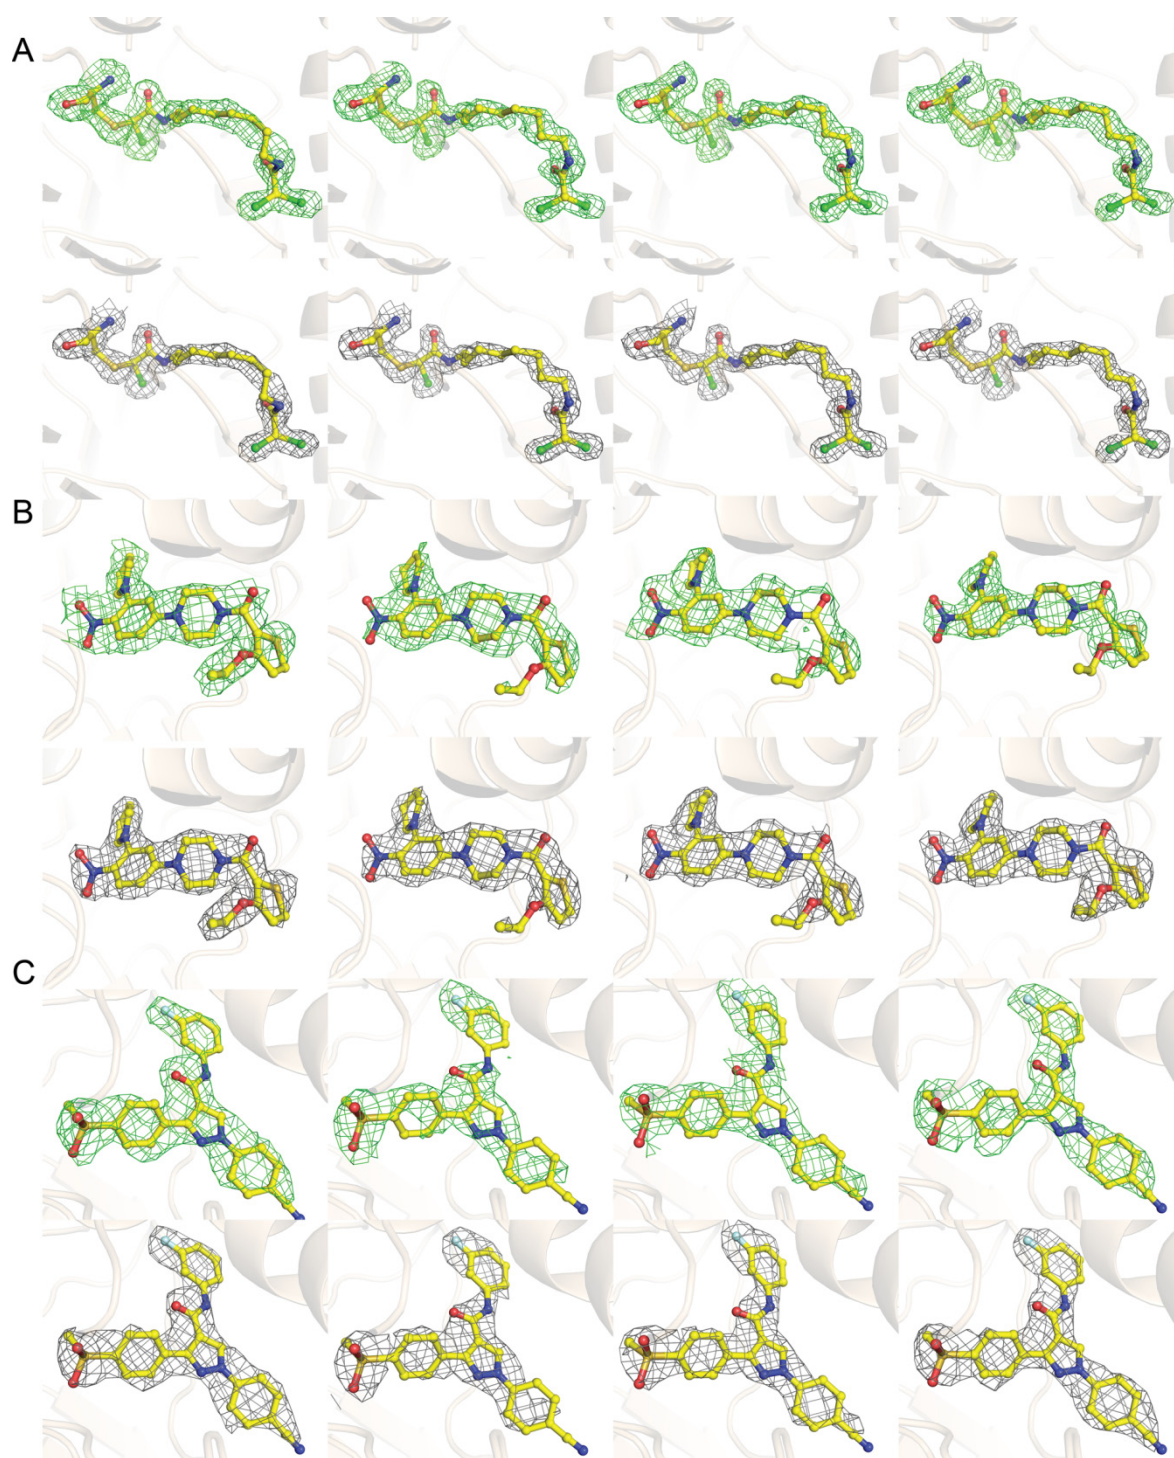

**Fig. S2: Electron density maps of inhibitors in all four active sites of the ALDH1A2 tetramer.** (A) WIN18,446, (B) 6-118 and (C) CM121. The upper panels show the Fo-Fc density maps (contoured at  $2\sigma$ ) omitting the inhibitor during the last refinement cycle, the bottom panels show the 2Fo-Fc density maps (contoured at  $1\sigma$ ) of the completed refinement.

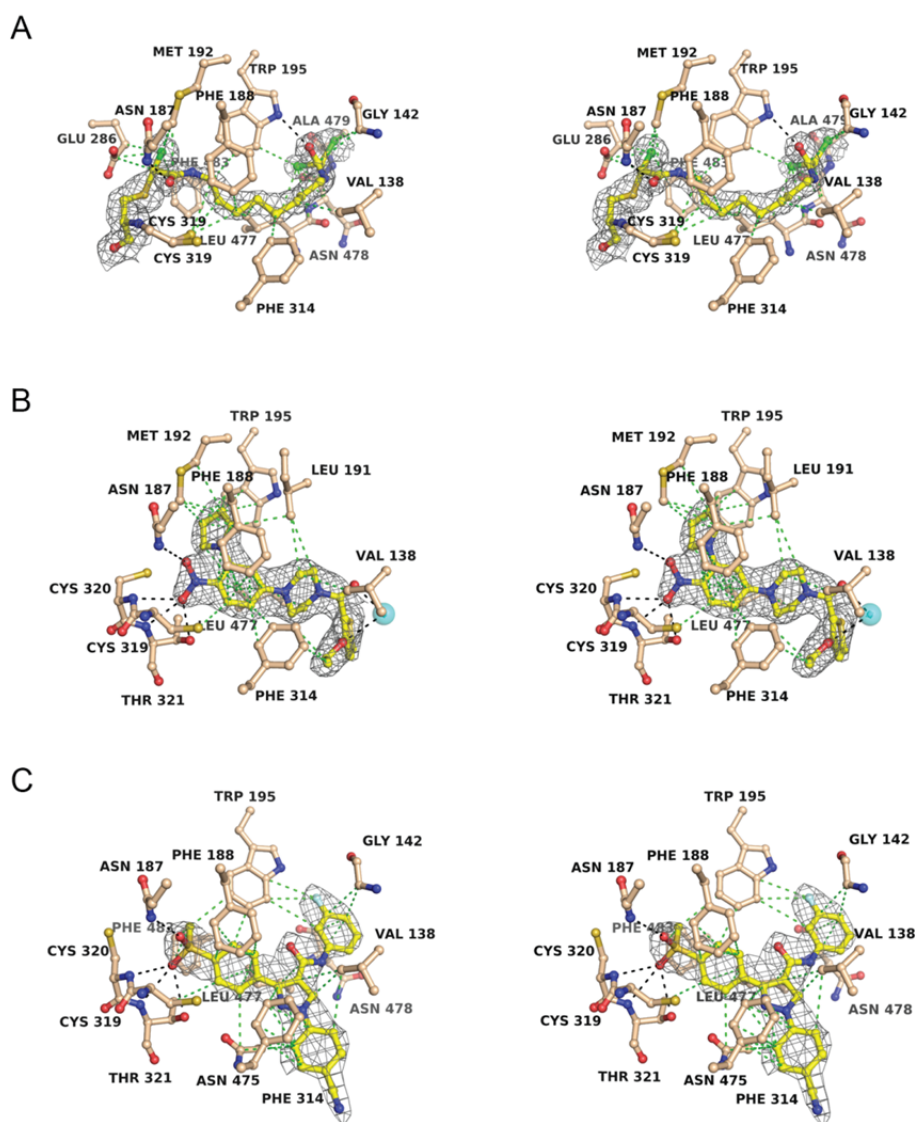

**Fig. S3: Stereo presentations of the binding interactions of inhibitors in ALDH1A2. (A) WIN18,446, (B) 6-118 and (C) CM121.**
