# Supplementary material
Source: PubMed Central journal article supplement (PMC6089219)
Supplement: NIHMS983666-supplement-b.pdf [file NIHMS983666-supplement-b.pdf]

| Compound_ID | SMILES                                                                              |
|-------------|-------------------------------------------------------------------------------------|
| WIN18,446   | <chem>CIC(Cl)C(NCCCCCCCCNC(C(Cl)Cl)=O)=O</chem>                                     |
| CM121       | <chem>O=C(NC1=CC=CC(F)=C1)C2=CN(C3=CC=C(C#N)C=C3)N=C2C4=CC=C(S(=O)(C)=O)C=C4</chem> |
| 6-118       | <chem>O=C(C1=C(OCC)C=CS1)N(CC2)CCN2C3=CC=C([N+][O-])=O)C(N4CCCC4)=C3</chem>         |
